# Supplementary figures and images for: Cell colony counter called CoCoNut
Source: PLOS journal article supplement (doi:10.1371/journal.pone.0205823), 2018-11-07

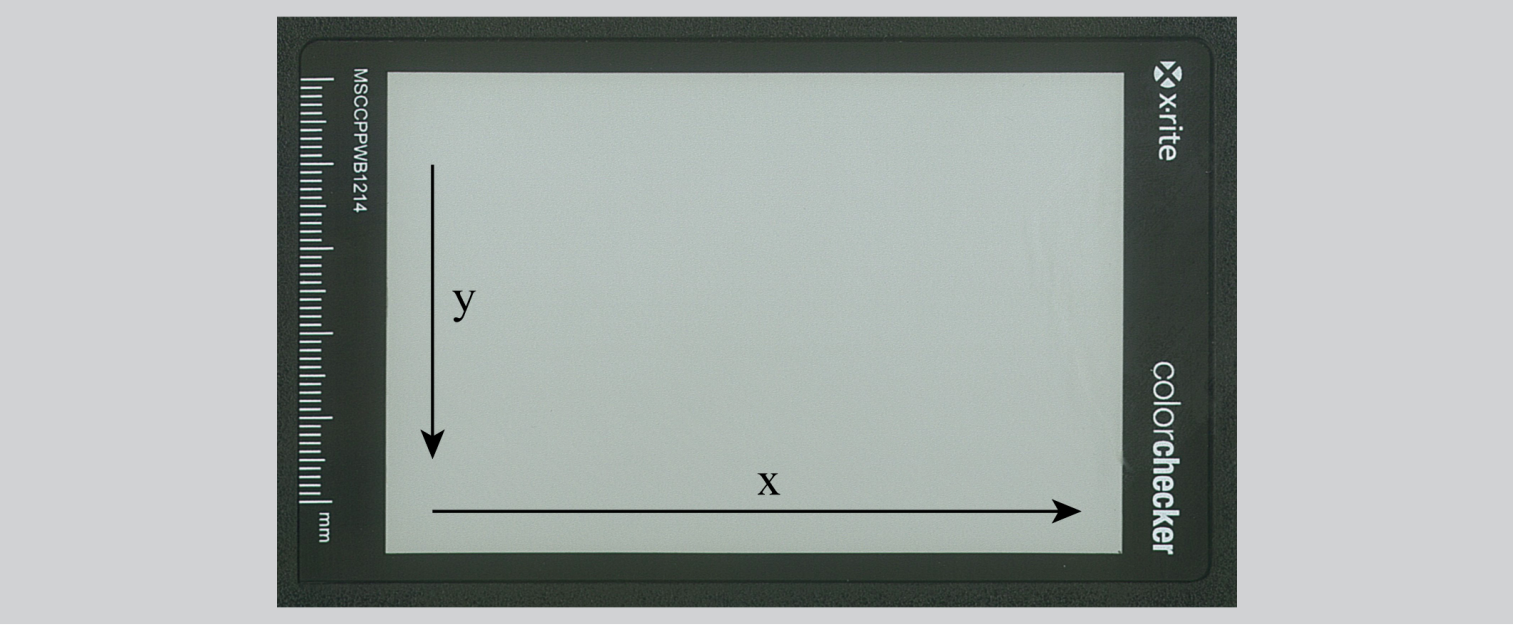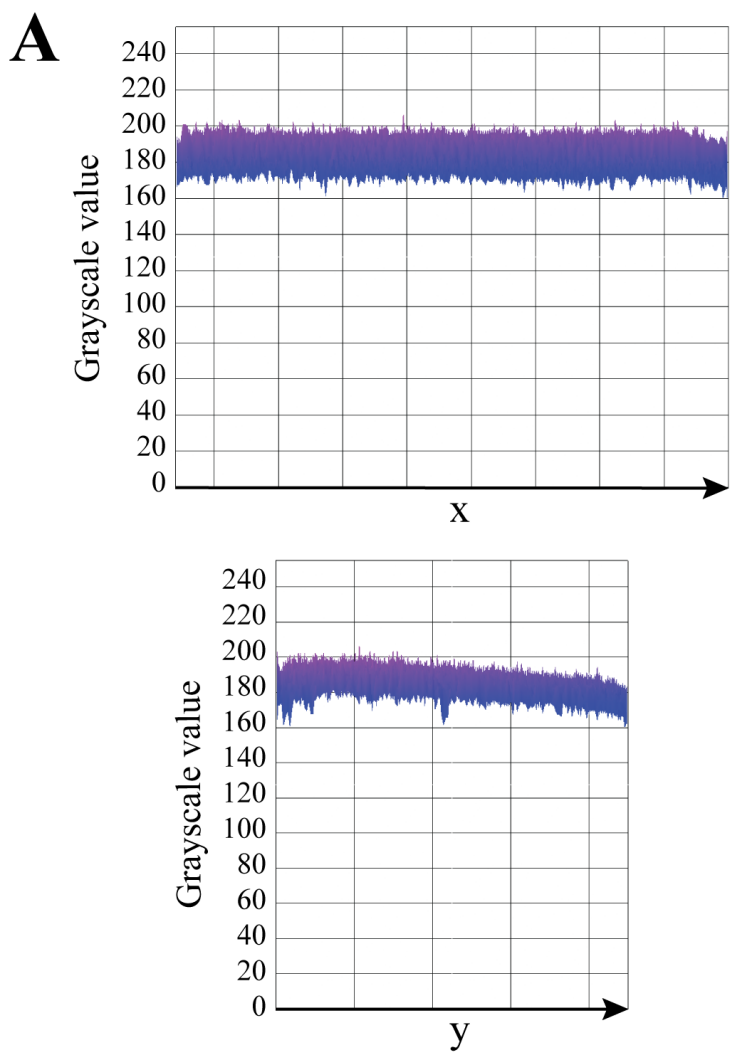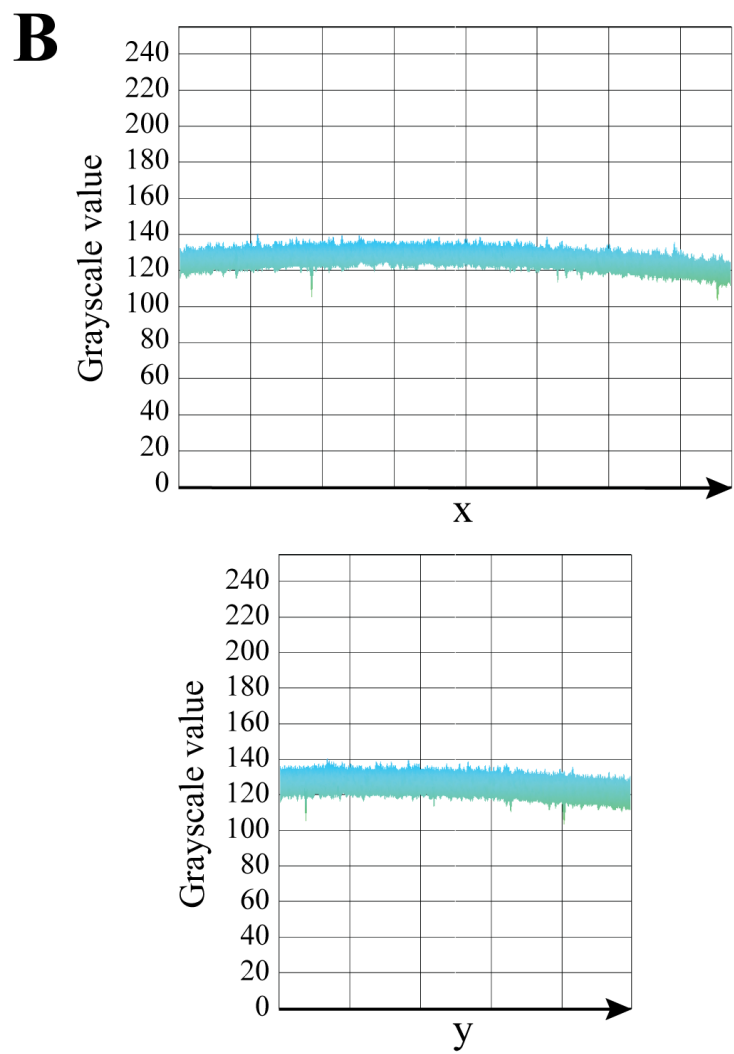

Fig A

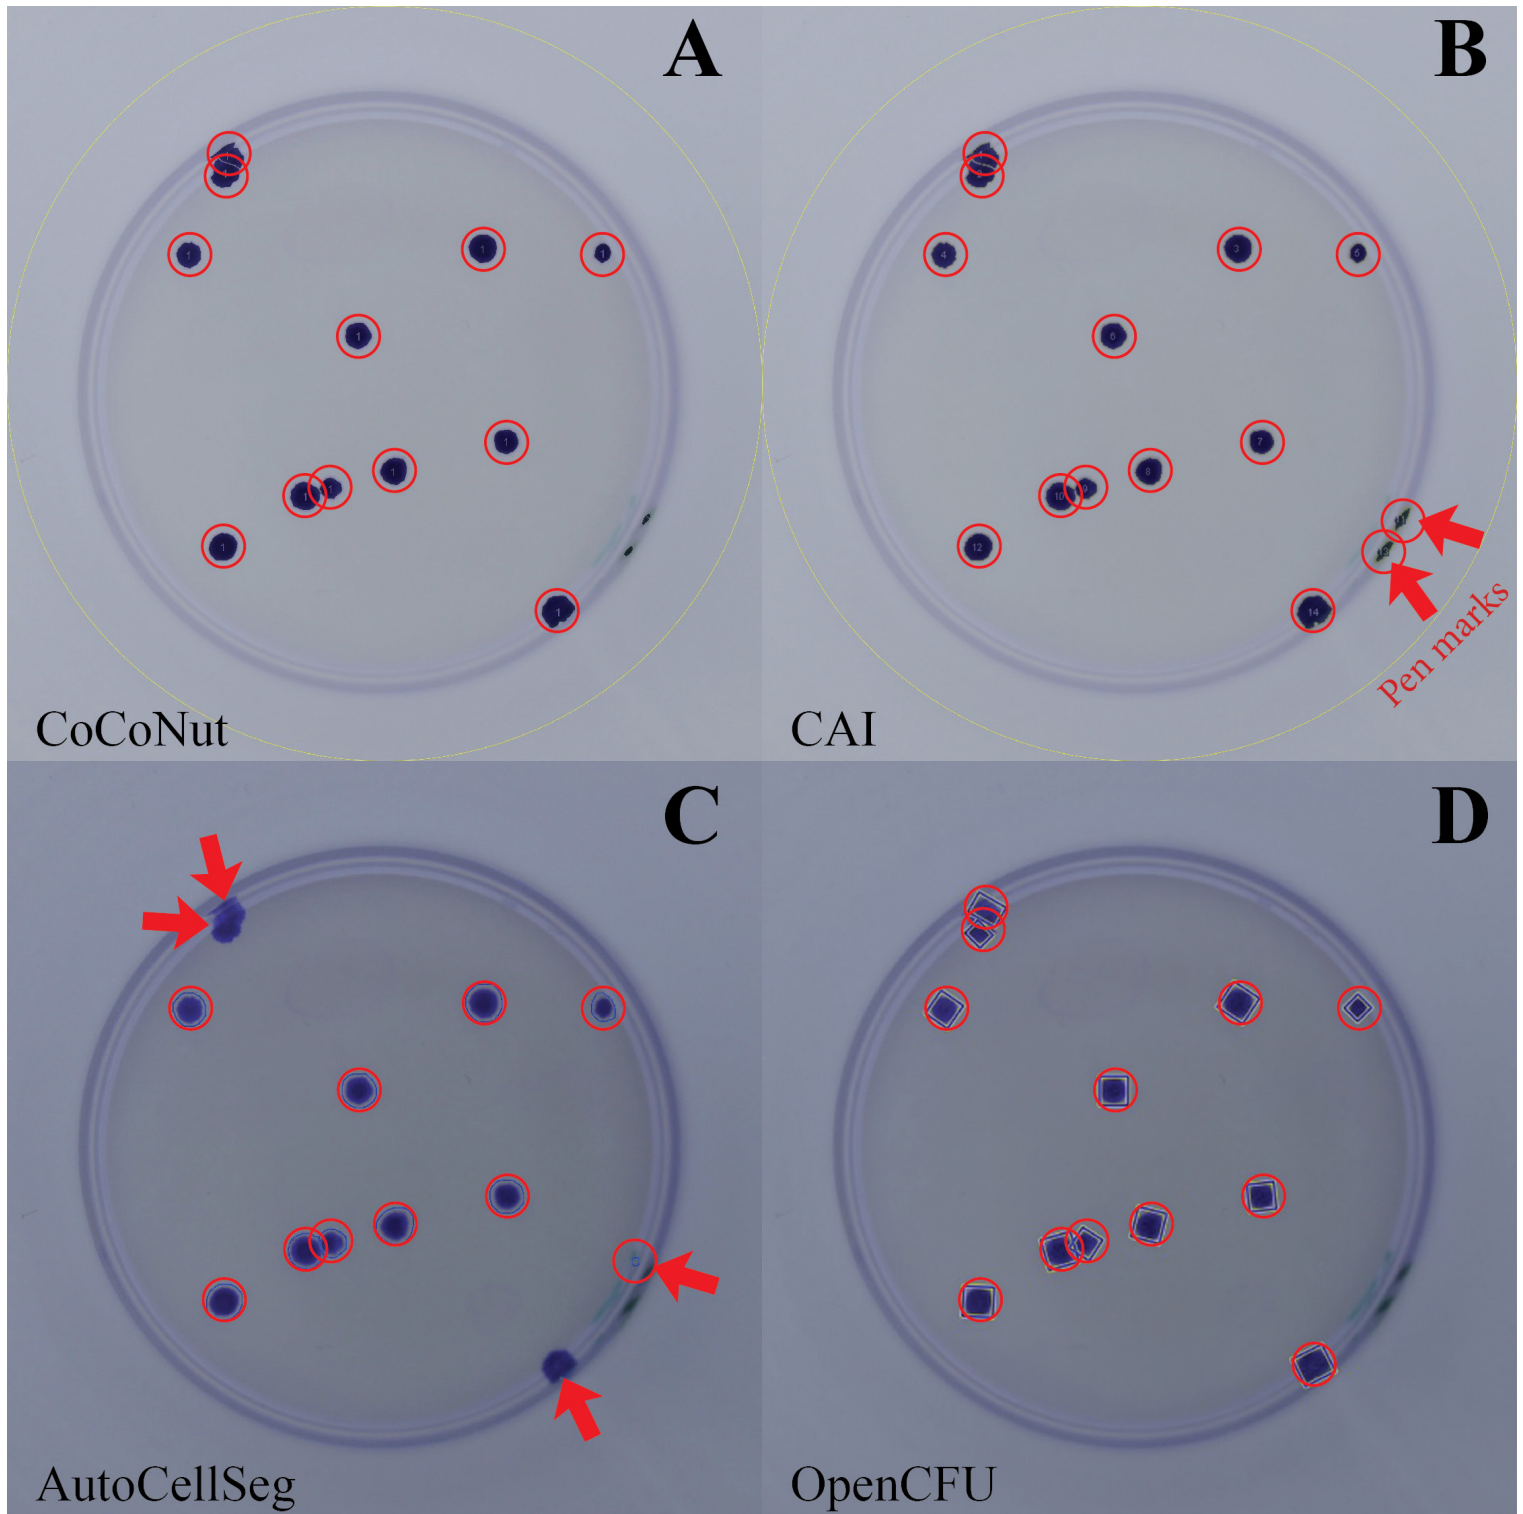

Fig B

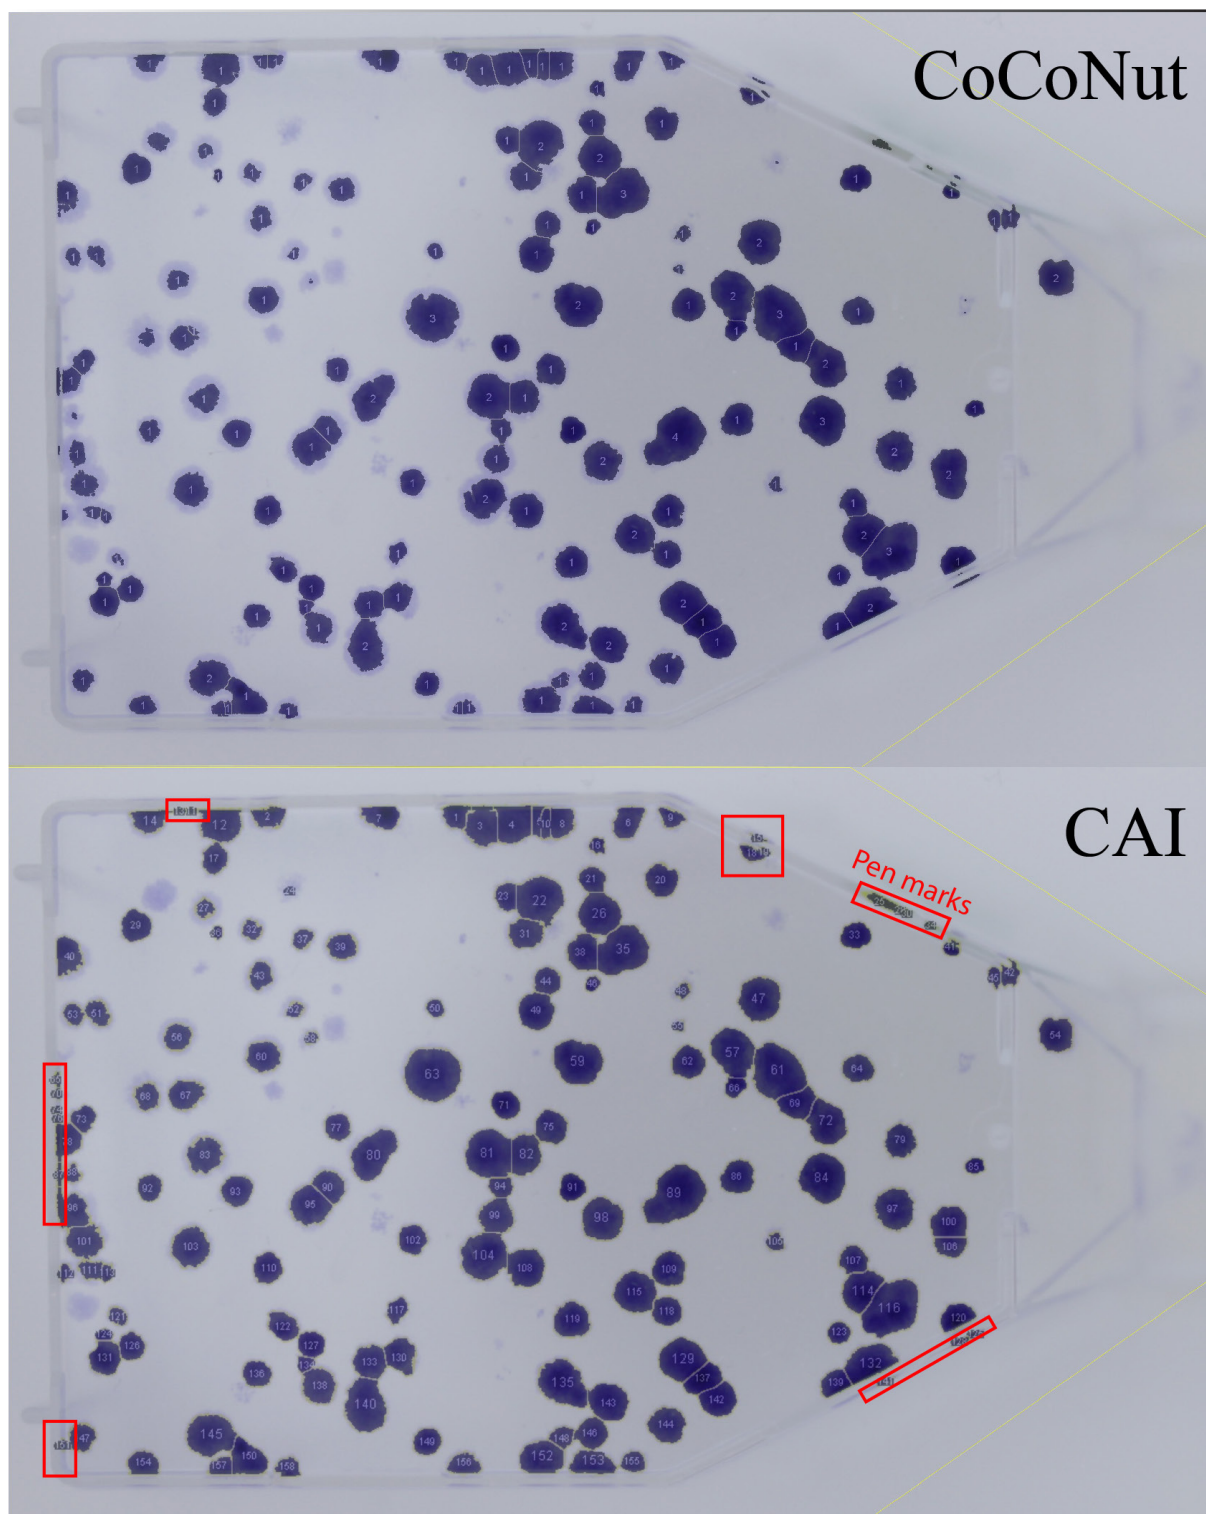

Fig C

Supplement: S6 (10.1371/journal.pone.0205823.s006) [file journal.pone.0205823.s006]
